# Supplementary material
Source: PubMed Central journal article supplement (PMC4161128)
Supplement: NIHMS622050-supplement-supplementary.pdf [file NIHMS622050-supplement-supplementary.pdf]

**SUPPLEMENTARY TABLE 1**

Effect of the subtraction methods on the COV

| Mouse | First Scan %ID/g | Second scan %ID/g calculated by subtracting the residual activity from the first scan | COV             | Second scan %ID/g calculated by subtracting the residual activity from the delayed scan | COV             |
|-------|------------------|---------------------------------------------------------------------------------------|-----------------|-----------------------------------------------------------------------------------------|-----------------|
| 2     | 5.0              | 5.0                                                                                   | 0.5             | 5.2                                                                                     | 2.6             |
| 5     | 5.1              | 5.2                                                                                   | 2.3             | 5.3                                                                                     | 3.1             |
| 7     | 4.3              | 6.4                                                                                   | 27.1            | 6.3                                                                                     | 26.7            |
| 12    | 3.1              | 3.7                                                                                   | 13.5            | 3.7                                                                                     | 12.3            |
| 18    | 6.5              | 4.8                                                                                   | 20.4            | 5.0                                                                                     | 18.1            |
| 22    | 4.3              | 4.6                                                                                   | 4.7             | 4.7                                                                                     | 6.0             |
| 23    | 5.4              | 3.6                                                                                   | 28.8            | 3.6                                                                                     | 28.2            |
|       |                  | Mean $\pm$ SD                                                                         | 13.9 $\pm$ 11.8 | Mean $\pm$ SD                                                                           | 13.9 $\pm$ 10.7 |
